# Supplementary material for: Enhancing photocatalytic water splitting via GeC/SGaSnP Z-scheme heterojunctions with built-in electric fields
Source: Royal Society of Chemistry journal article supplement (doi:10.1039/d4ta07893d), 2024-12-30
Supplement: d4ta07893d1.pdf [file d4ta07893d1.pdf]

## **Enhancing Photocatalytic Water Splitting via GeC/SGaSnP**

### **Z-Scheme Heterojunctions with Built-in Electric Fields**

Wenhua Lou<sup>a,b</sup>, Gang Liu<sup>a,\*</sup>, Xiaoguang Ma<sup>b,\*</sup>, Chuanlu Yang<sup>b</sup>, Lixun Feng<sup>b</sup>, Ying Liu<sup>b</sup>, Xiaochun Gao<sup>b</sup>

<sup>a</sup> College of Electronic Engineering, Beijing University of Posts and Telecommunications, Beijing 100876, China

<sup>b</sup> School of Physics and Optoelectronic Engineering, Ludong University, Yantai 264025, China

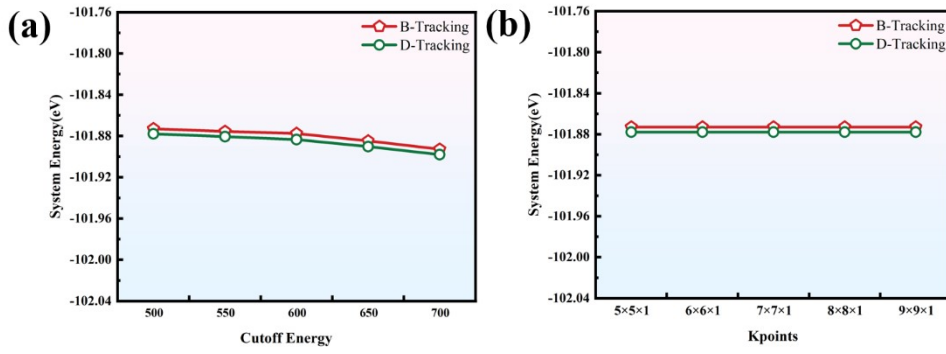

Fig. S1: Convergence Tests for B-stacking and D-stacking GeC/SGaSnP heterojunctions. (a) Total energy variations with different plane-wave energy cutoffs (500 eV, 550 eV, 600 eV, 650 eV, 700 eV) for B-stacking and D-stacking configurations. (b) Total energy variations with different k-point grid densities ( $5 \times 5 \times 1$ ,  $6 \times 6 \times 1$ ,  $7 \times 7 \times 1$ ,  $8 \times 8 \times 1$ ,  $9 \times 9 \times 1$ ) for B-stacking and D-stacking configurations.

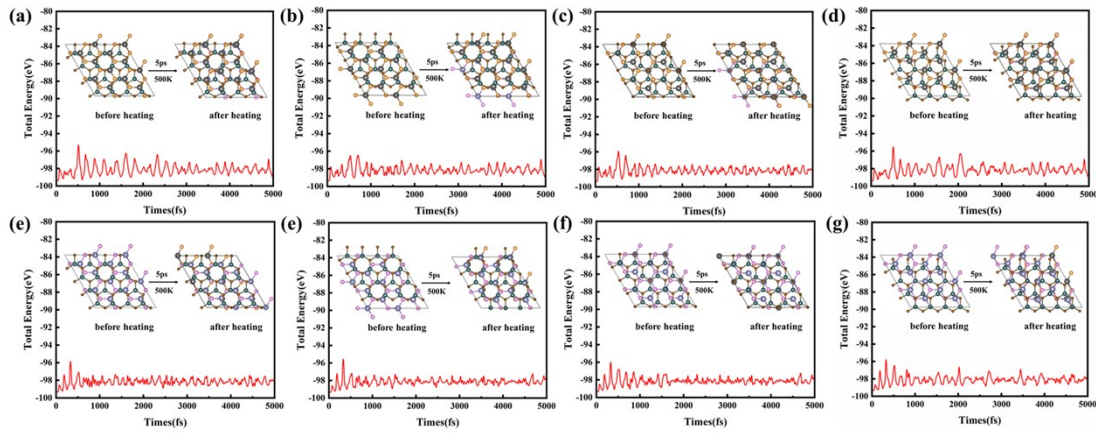

Fig. S2: Ab initio molecular dynamics (AIMD) simulations of (a) stacking mode A, (b) stacking mode B, (c) stacking mode C, (d) stacking mode D, (e) inverted stacking mode A', (f) inverted stacking mode B', (g) inverted stacking mode C', and (h) inverted stacking mode D' of GeC/SGaSnP. The temperature was set to 500 K with a time step of 2 fs, and a simulation time of 5 ps.

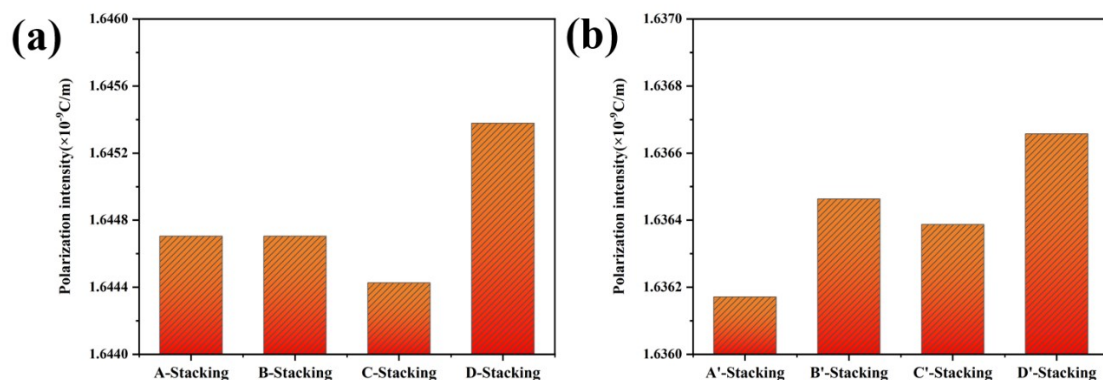

Fig. S3: Calculated polarization intensities of the GeC/SGaSnP heterostructures for stacking configurations A–D (a) and A'–D' (b), employing the Berry phase method.

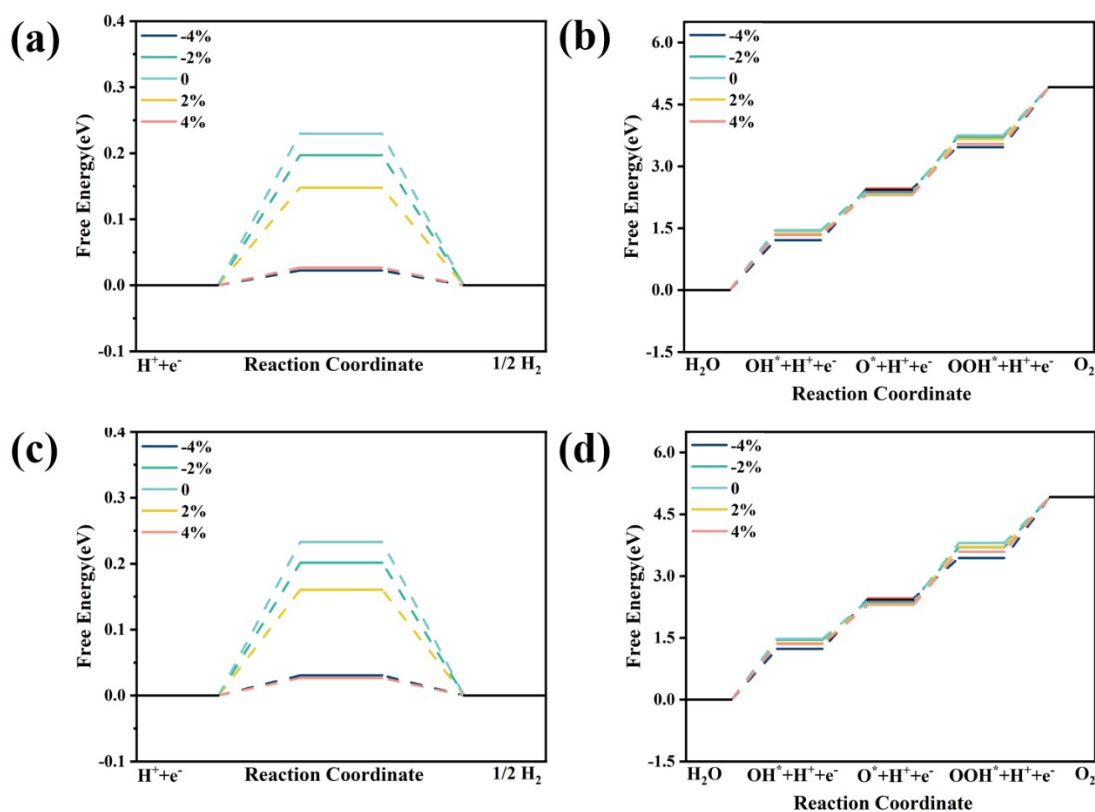

Fig. S4: Effect of strain on the HER and OER performance in the B-stacking and D-stacking configurations. Figure (a) and (b) present the HER and OER performance for the B-stacking configuration, respectively, while (c) and (d) illustrate the HER and OER performance for the D-stacking configuration. The color scale represents different applied strains: deep blue corresponds to 4% compressive strain, green to 2% compressive strain, cyan to no strain, light yellow to 2% tensile strain, and red to 4% tensile strain.

Table. S1: Comparative Analysis of Key Performance Metrics for Advanced Z-Scheme Heterojunction Photocatalysts

| Structure                                          | Lifetime(electron)/ps | Lifetime(hole)/ps | Energy Barrier (HER)/eV | Energy Barrier (OER)/eV | Ref       |
|----------------------------------------------------|-----------------------|-------------------|-------------------------|-------------------------|-----------|
| MoSe <sub>2</sub> /Ti <sub>2</sub> CO <sub>2</sub> | 0.5(100%-5%)          | 0.5(100%-15%)     | -                       | 1.98                    | [1]       |
| MgO /g-C <sub>3</sub> N <sub>4</sub>               | 0.24                  | 0.47              | >0.3                    | >0.4                    | [2]       |
| OH/OCN-PNR <sub>s</sub>                            | 1.5(90%-54%)          | 1.5(72%-32%)      | >1                      | 1.06                    | [3]       |
| Se@CTF-0/ $\beta$ -Sb                              | 0.21                  | 0.6               | 1.04                    | 0.72                    | [4]       |
| g-C <sub>3</sub> N <sub>4</sub> /TiO <sub>2</sub>  | <0.3ps                | <0.3ps            | -                       | -                       | [5]       |
| C <sub>2</sub> N/BCN                               | < 1ps                 | < 1ps             | -                       | -                       | [6]       |
| Defective BP(5 9)/SnSe <sub>2</sub>                | 4.01                  | 8.46              | 0.47                    | 0.32                    | [7]       |
| $\beta$ -As/Ti <sub>2</sub> CO <sub>2</sub>        | 0.2                   | 0.8               | 0.57                    | 0.63                    | [8]       |
| B-Stacking GeC/SGaSnP                              | 0.66                  | 634.92            | 0.23                    | 0.21                    | This work |
| D-Stacking GeC/SGaSnP                              | 37.04                 | 0.59              | 0.23                    | 0.25                    | This work |

Table S2: Ionic dipole moment, electronic dipole moment, total dipole moment, and polarization intensities of GeC/SGaSnP heterostructures with different stacking configurations calculated using the Berry phase method.

| Type | Ionic dipole moment/(e $\times$ Å) | Electronic dipole moment/(e $\times$ Å) | Total dipole moment/(e $\times$ Å) | Polarization intensity(C/m) |
|------|------------------------------------|-----------------------------------------|------------------------------------|-----------------------------|
| A    | 17.1496                            | 20.8743                                 | 38.0239                            | 1.64471E-9                  |
| B    | 17.1496                            | 20.8743                                 | 38.0239                            | 1.64471E-9                  |
| C    | 17.1675                            | 20.8499                                 | 38.0174                            | 1.64443E-9                  |
| D    | 17.1161                            | 20.9233                                 | 38.0394                            | 1.64538E-9                  |
| A'   | 5.93069                            | 31.8959                                 | 37.8266                            | 1.63617E-9                  |
| B'   | 5.9217                             | 31.9116                                 | 37.8333                            | 1.63646E-9                  |
| C'   | 5.94633                            | 31.8852                                 | 37.8316                            | 1.63639E-9                  |
| D'   | 5.87369                            | 31.9641                                 | 37.8378                            | 1.63666E-9                  |

## References

1. C.-F. Fu, X. Li and J. Yang, *Chem. Sci.*, 2021, **12**, 2863-2869.
2. N. Liu, S. Zhou and J. Zhao, *Mater. Today Phys.*, 2021, **16**, 100312.
3. Y. Gao, C. Fu, W. Hu and J. Yang, *J. Phys. Chem. Lett.*, 2021, **13**, 1-11.
4. Q.-G. Sun, C.-L. Yang, X. Li, Y. Liu, W. Zhao and X. Ma, *Colloids Surf. A Physicochem. Eng. Asp.*, 2024, **703**, 135437.
5. H. Nam, C. Kim, E. S. Sim, M. Je, H. Choi and Y.-C. Chung, *J. Phys. Chem. C*, 2023, **127**, 19995-20003.
6. R. Zhang, L. Zhang, Q. Zheng, P. Gao, J. Zhao and J. Yang, *J. Phys. Chem. Lett.*, 2018, **9**, 5419-5424.
7. Y. Fan, X. Song, X. Ma, W. Li and M. Zhao, *J. Phys. Chem. Lett.*, 2022, **13**, 9363-9371.
8. L. Hua, Y. Wang and Z. Li, *Adv. Funct. Mater.*, 2024, **34**, 2408353.
